# Supplementary material for: Host defense peptide mimicking cyclic peptoid polymers exerting strong activity against drug-resistant bacteria
Source: Royal Society of Chemistry journal article supplement (doi:10.1039/d2bm00587e), 2022-01-01
Supplement: d2bm00587e1.pdf [file d2bm00587e1.pdf]

## Supplemental Information

### Host Defense Peptide Mimicking Cyclic Peptoid Polymers Exerting Strong Activity against Drug-Resistant Bacteria

Wenjing Zhang,<sup>‡a</sup> Shuai Deng,<sup>‡a</sup> Min Zhou,<sup>\*a</sup> Jingcheng Zou,<sup>b</sup> Jiayang Xie,<sup>b</sup> Ximian Xiao,<sup>b</sup> Ling Yuan,<sup>b</sup> Zhemin Ji,<sup>b</sup> Sheng Chen,<sup>b</sup> Ruxin Cui,<sup>b</sup> Zhengjie Luo,<sup>b</sup> Guixue Xia,<sup>b</sup> Runhui Liu<sup>\*a,b</sup>

<sup>a</sup>State Key Laboratory of Bioreactor Engineering, East China University of Science and Technology, Shanghai 200237, China.

<sup>b</sup>Key Laboratory for Ultrafine Materials of Ministry of Education, Frontiers Science Center for Materiobiology and Dynamic Chemistry, Shanghai Frontiers Science Center of Optogenetic Techniques for Cell Metabolism, Research Center for Biomedical Materials of Ministry of Education, School of Materials Science and Engineering, East China University of Science and Technology, Shanghai 200237, China

\*Corresponding authors. E-mail: [rliu@ecust.edu.cn](mailto:rliu@ecust.edu.cn); [minzhou@ecust.edu.cn](mailto:minzhou@ecust.edu.cn)

‡These authors contributed equally to this work.

#### Figure captions

**Fig. S1.** Synthesis route of *N*-pentafluorobenzyl-NNCA monomer

**Fig. S2.** <sup>1</sup>H NMR of *N*<sup>β</sup>-Cbz-aminoethyl-NNCA monomer

**Fig. S3.** HRESI-MS of *N*<sup>β</sup>-Cbz-aminoethyl-NNCA monomer

**Fig. S4.** <sup>1</sup>H NMR of *N*-[(perfluorophenyl)methyl]-*N*-[(tert-butoxy)carbonyl]glycine (compound 3)

**Fig. S5.** <sup>1</sup>H NMR of *N*-pentafluorobenzyl-NNCA monomer (compound 4)

**Fig. S6.** <sup>13</sup>C NMR of *N*-pentafluorobenzyl-NNCA monomer (compound 4)

**Fig. S7.** HREI-MS of *N*-pentafluorobenzyl-NNCA monomer (compound 4)

**Table S1.** GPC analysis of *N*-Cbz protected cyclic poly(Naeg<sub>x</sub>Npfbg<sub>y</sub>)<sub>20</sub> (x=0.4 – 0.9)

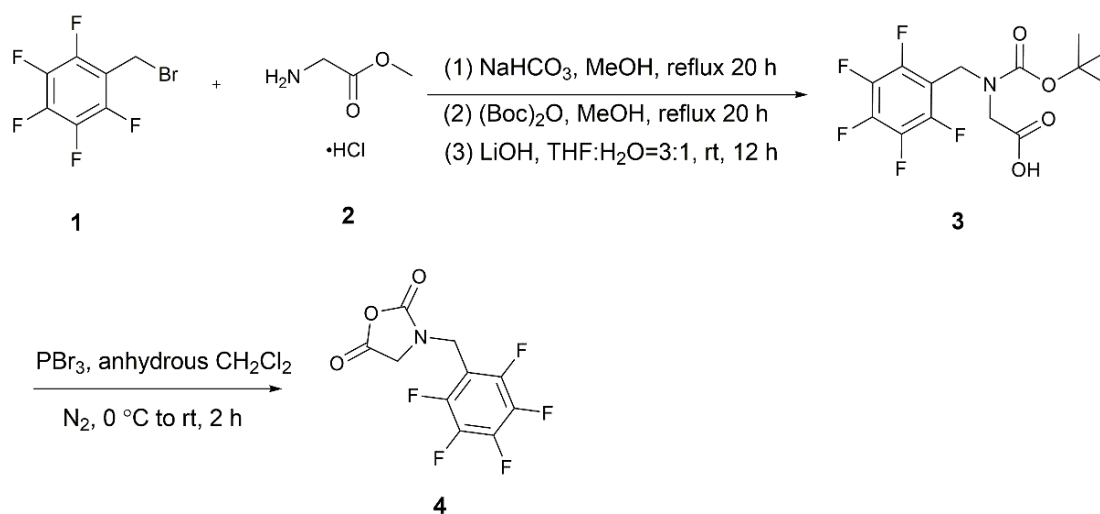

**Fig. S1.** Synthesis route of *N*-pentafluorobenzyl-NNCA monomer.

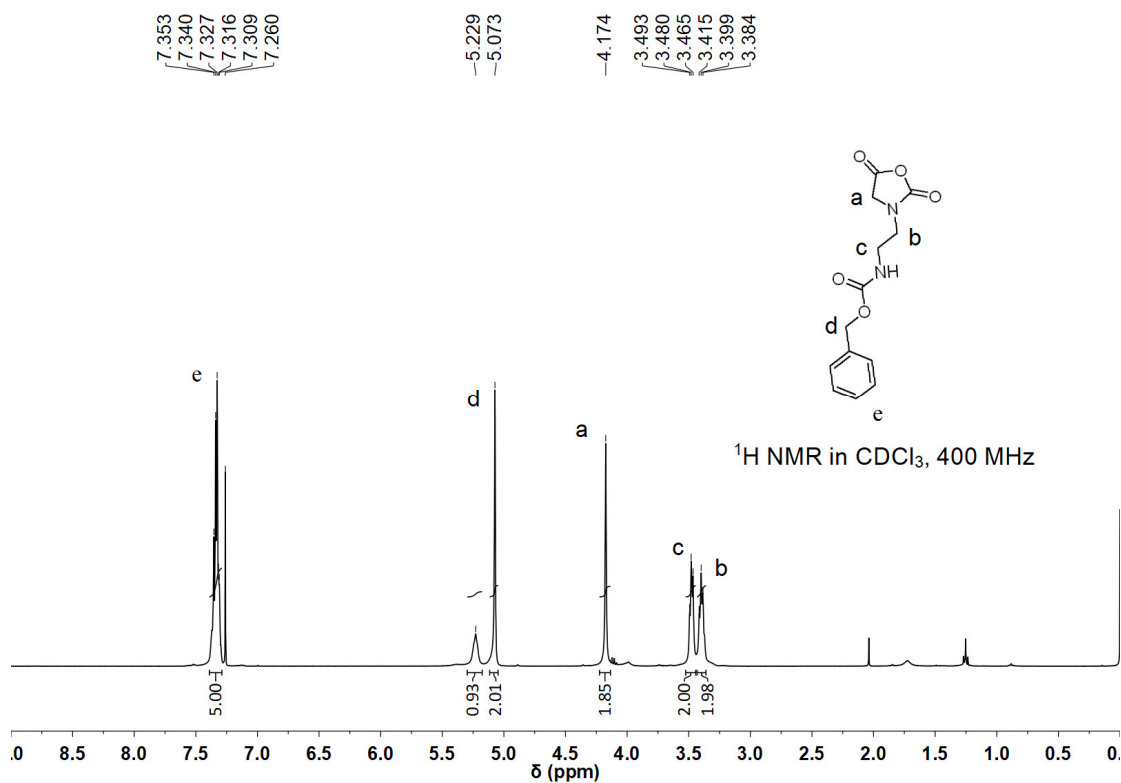

**Fig. S2.**  $^1\text{H NMR}$  spectrum of *N*<sup>β</sup>-Cbz-aminoethyl-NNCA monomer in  $\text{CDCl}_3$  at 400 MHz.

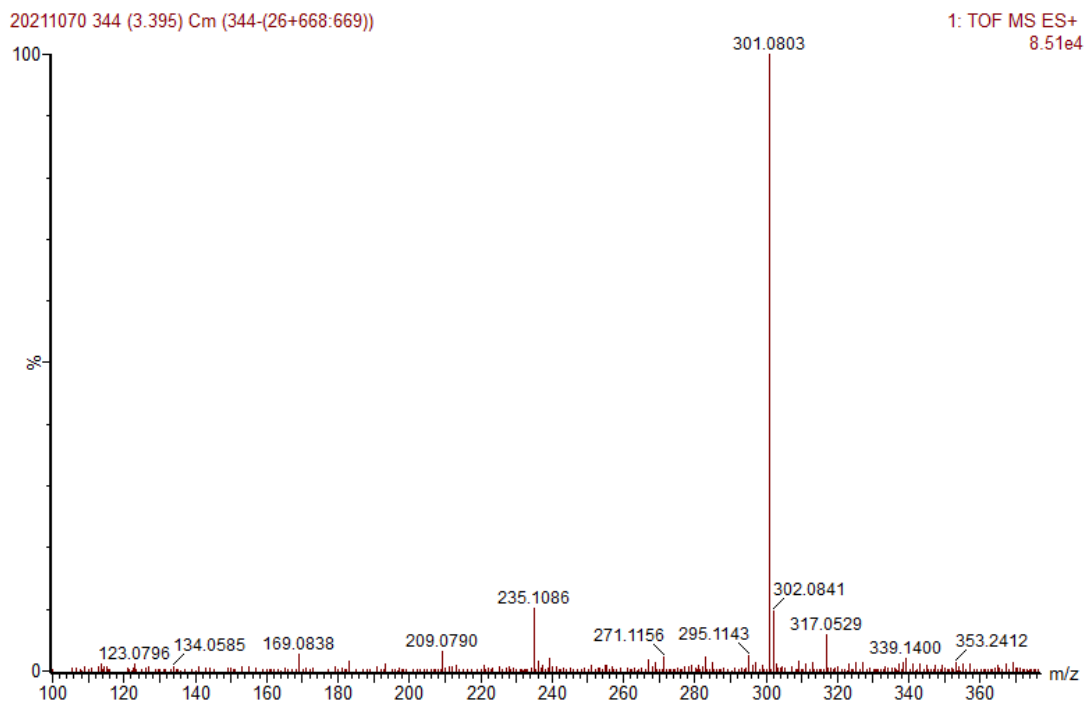

**Fig. S3.** HRESI-MS characterization of  $N^\beta$ -Cbz-aminoethyl-NNCA monomer.

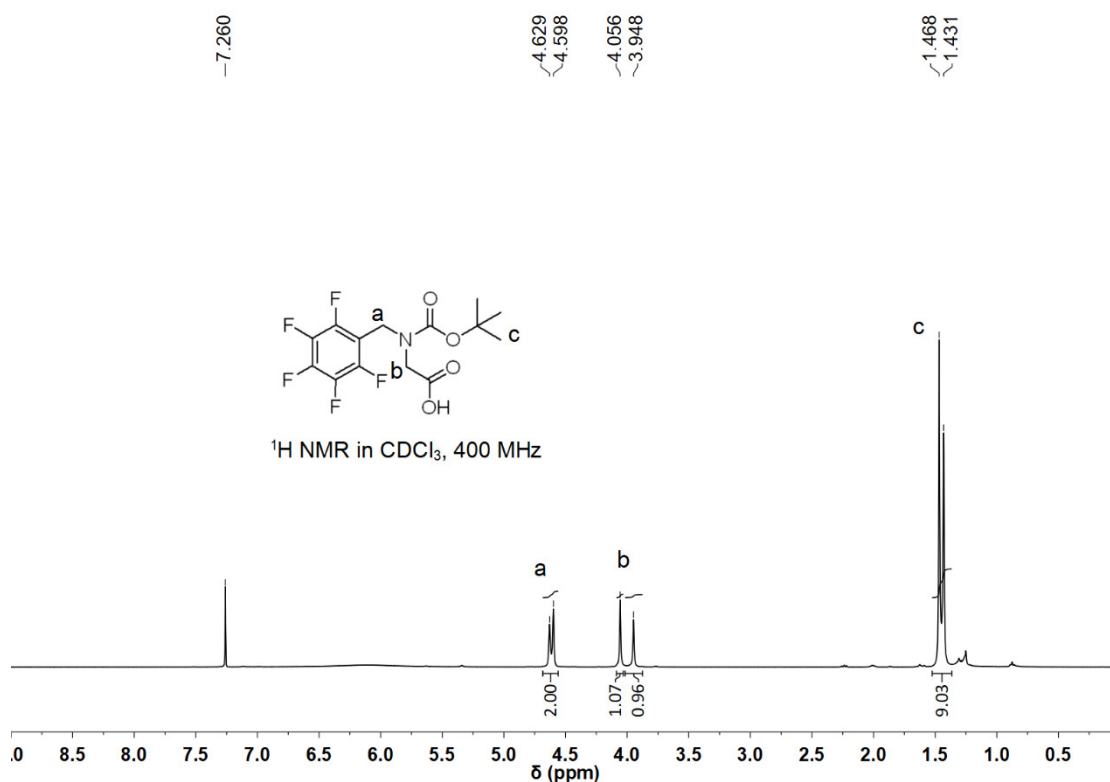

**Fig. S4.**  $^1\text{H}$  NMR spectrum of  $N$ -[(perfluorophenyl)methyl]- $N$ -[(tert-butoxy)carbonyl]glycine (compound 3) in  $\text{CDCl}_3$  at 400 MHz.

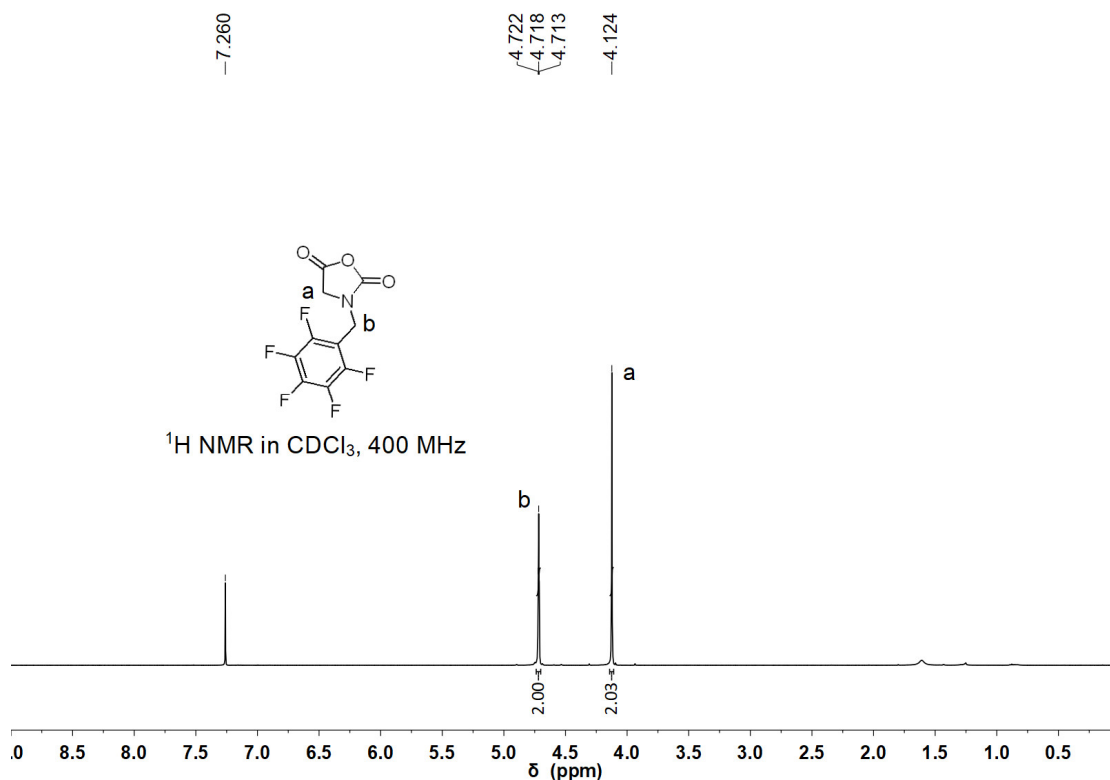

**Fig. S5.** <sup>1</sup>H NMR spectrum of *N*-pentafluorobenzyl-NNCA monomer (compound 4) in CDCl<sub>3</sub> at 400 MHz.

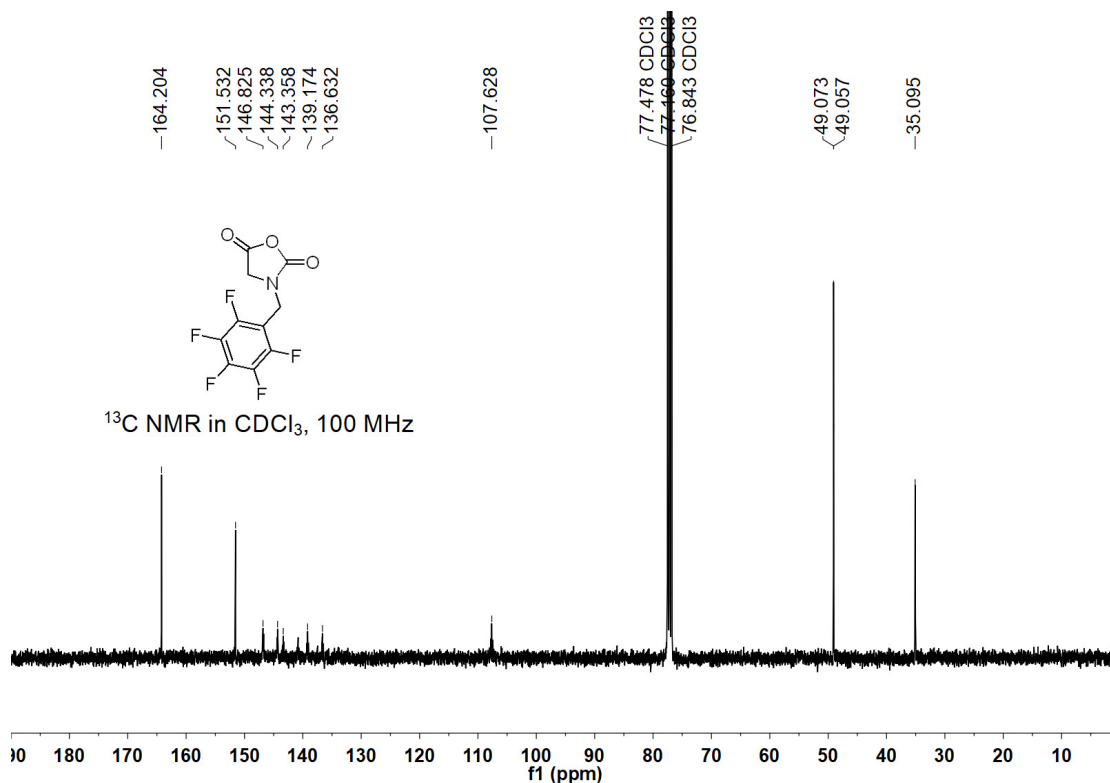

**Fig. S6.** <sup>13</sup>C NMR spectrum of *N*-pentafluorobenzyl-NNCA monomer (compound 4) in CDCl<sub>3</sub> at 100 MHz.

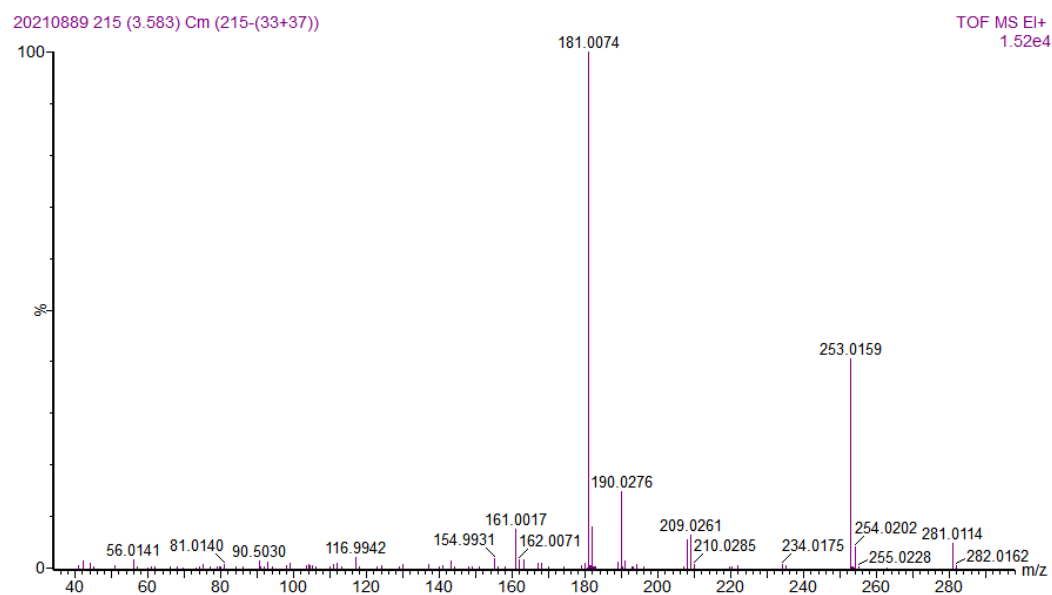

**Fig. S7.** HREI-MS characterization result of *N*-pentafluorobenzyl-NNCA monomer (compound 4).

**Table S1.** GPC characterization of *N*-Cbz protected cyclic poly(Naeg<sub>x</sub>Npfbg<sub>y</sub>)<sub>20</sub> (x = 0.4 – 0.9, x and y represent content of two monomers respectively)

| Naeg : Npfbg<br>x : y | [M] <sub>0</sub> : [I] <sub>0</sub> | <i>M</i> <sub>n</sub> (Da) | DP | <i>D</i> |
|-----------------------|-------------------------------------|----------------------------|----|----------|
| 40:60                 | 20                                  | 3700                       | 15 | 1.24     |
| 50:50                 | 20                                  | 3700                       | 16 | 1.24     |
| 60:40                 | 20                                  | 4000                       | 17 | 1.25     |
| 70:30                 | 20                                  | 4100                       | 17 | 1.26     |
| 80:20                 | 20                                  | 4000                       | 17 | 1.27     |
| 90:10                 | 20                                  | 4000                       | 17 | 1.26     |
